# Supplementary material for: A semi-synthetic glycosaminoglycan analogue inhibits and reverses Plasmodium falciparum cytoadherence
Source: PLoS One. 2017 Oct 18;12(10):e0186276. doi: 10.1371/journal.pone.0186276 (PMC5646806; doi:10.1371/journal.pone.0186276)
Supplement: S1 Data — (XLSX) [file pone.0186276.s006.xlsx]

## Sheet: Sheet1
	Data for Figure 1 (Means and Stdev)
	Fig 1A
	GSII	Means							Stdev
			0	5	10	15	20			0	5	10	15	20
		HUVEC	100	86.788	78.5205	67.3147	54.0845		HUVEC	0	4.34704	4.80382	4.90656	5.79107
		HDMEC	100	94.1947	79.9017	67.433	46.0993		HDMEC	0	14.8378	11.838	12.4862	8.68359
		HBEC5i	100	96.412	81.9997	72.8953	66.7949		HBEC5i	0	3.70245	3.74524	1.07345	2.1168
	Fig 1B
	PACS	Means							Stdev
			0	5	10	15	20			0	5	10	15	20
		HUVEC	100	103.267	98.7382	89.8525	84.9824		HUVEC	0	3.03884	5.95598	6.82192	5.53308
		HDMEC	100	100.644	104.921	88.8173	77.4767		HDMEC	0	20.6379	6.67306	22.2048	18.7565
		HBEC5i	100	98.2549	87.9856	86.6063	83.8595		HBEC5i	0	6.64911	6.33232	5.84039	6.20274
