# Supplementary material for: A semi-synthetic glycosaminoglycan analogue inhibits and reverses Plasmodium falciparum cytoadherence
Source: PLoS One. 2017 Oct 18;12(10):e0186276. doi: 10.1371/journal.pone.0186276 (PMC5646806; doi:10.1371/journal.pone.0186276)
Supplement: S2 Data — (XLSX) [file pone.0186276.s007.xlsx]

## Sheet: Sheet1
		Data for Figure 2 (Means and Stdev)
		Fig 2A
		GSII	Means							Stdev
				0	5	10	15	20			0	5	10	15	20
			HUVEC	100	84.2185	62.6414	51.358	33.7111		HUVEC	0	7.64516	9.6517	8.89858	5.72666
			HDMEC	100	86.0974	52.8309	42.7118	30.4128		HDMEC	0	23.5233	13.912	10.7261	7.22253
			HBEC5i	100	94.1832	87.6749	80.7196	72.279		HBEC5i	0	5.16973	2.63511	3.3776	3.93155
		Fig 2B
		PACS	Means							Stdev
				0	5	10	15	20			0	5	10	15	20
			HUVEC	100	96.2013	88.5337	76.9602	67.2417		HUVEC	0	8.47913	7.05507	5.89487	6.32047
			HDMEC	100	97.3968	89.2489	71.8394	52.4682		HDMEC	0	7.05629	7.60069	5.39307	10.5835
			HBEC5i	100	95.5016	92.5102	89.726	87.1813		HBEC5i	0	5.38757	4.89763	5.18639	4.86345
