# Supplementary material for: A semi-synthetic glycosaminoglycan analogue inhibits and reverses Plasmodium falciparum cytoadherence
Source: PLoS One. 2017 Oct 18;12(10):e0186276. doi: 10.1371/journal.pone.0186276 (PMC5646806; doi:10.1371/journal.pone.0186276)
Supplement: S3 Data — (XLSX) [file pone.0186276.s008.xlsx]

## Sheet: Sheet1
Flow assay - reversal: protein (ICAM-1) with patient isolates
						*4 to convert to prbc/mm2							Convert to % 0 min
ItG (control)	0	5	10	15	20															ItG
exp1	322	320	298	249	256		1288	1280	1192	996	1024		100	99.3789	92.5466	77.3292	79.5031			Means
	329	316	296	258	251		1316	1264	1184	1032	1004		100	96.0486	89.9696	78.4195	76.2918				0	5	10	15	20
	346	324	297	256	250		1384	1296	1188	1024	1000		100	93.6416	85.8382	73.9884	72.2543			Control	100	95.5249	89.9887	77.5678	69.9966
	345	325	295	250	249		1380	1300	1180	1000	996		100	94.2029	85.5072	72.4638	72.1739			GSII	100	92.8523	75.3791	64.8403	57.5046
	342	321	294	254	248		1368	1284	1176	1016	992		100	93.8596	85.9649	74.269	72.5146			PACS	100	95.5559	90.3194	84.5275	76.878
	331	321	290	255	242		1324	1284	1160	1020	968		100	96.9789	87.6133	77.0393	73.1118
exp2	405	379	365	331	250		1620	1516	1460	1324	1000		100	93.5802	90.1235	81.7284	61.7284			stdev
	408	380	370	330	269		1632	1520	1480	1320	1076		100	93.1373	90.6863	80.8824	65.9314				0	5	10	15	20
	402	381	371	289	270		1608	1524	1484	1156	1080		100	94.7761	92.2886	71.8905	67.1642			Control	0	2.08975	3.06137	4.28889	5.15394
	400	379	369	300	265		1600	1516	1476	1200	1060		100	94.75	92.25	75	66.25			GSII	0	2.36759	2.56512	1.30413	3.65319
	389	382	367	332	265		1556	1528	1468	1328	1060		100	98.2005	94.3445	85.347	68.1234			PACS	0	1.63361	1.73531	2.14463	2.09406
	399	390	370	329	259		1596	1560	1480	1316	1036		100	97.7444	92.7318	82.4561	64.9123
avrg							1472.67	1406	1327.33	1144.33	1024.67		100	95.5249	89.9887	77.5678	69.9966
std dev							138.804	127.516	154.193	145.051	37.0094		0	2.08975	3.06137	4.28889	5.15394
ItG (GSII)	0	5	10	15	20
exp1	381	350	283	254	238		1524	1400	1132	1016	952		100	91.8635	74.2782	66.6667	62.4672
	384	367	282	250	235		1536	1468	1128	1000	940		100	95.5729	73.4375	65.1042	61.1979
	385	368	280	251	230		1540	1472	1120	1004	920		100	95.5844	72.7273	65.1948	59.7403
	389	361	300	249	232		1556	1444	1200	996	928		100	92.8021	77.1208	64.0103	59.6401
	383	368	312	250	231		1532	1472	1248	1000	924		100	96.0836	81.4621	65.2742	60.3133
	382	360	300	251	230		1528	1440	1200	1004	920		100	94.2408	78.534	65.7068	60.2094
exp2	400	352	299	250	200		1600	1408	1196	1000	800		100	88	74.75	62.5	50
	389	360	292	256	212		1556	1440	1168	1024	848		100	92.545	75.0643	65.8098	54.4987
	399	359	289	254	220		1596	1436	1156	1016	880		100	89.9749	72.4311	63.6591	55.1378
	389	361	290	259	219		1556	1444	1160	1036	876		100	92.8021	74.5501	66.581	56.2982
	392	365	296	252	220		1568	1460	1184	1008	880		100	93.1122	75.5102	64.2857	56.1224
	395	362	295	250	215		1580	1448	1180	1000	860		100	91.6456	74.6835	63.2911	54.4304
avrg							1556	1444.33	1172.67	1008.67	894		100	92.8523	75.3791	64.8403	57.5046
std dev							25.7541	22.8486	36.654	12.0403	44.4277		0	2.36759	2.56512	1.30413	3.65319
ItG (PACS)	0	5	10	15	20
exp1	388	363	359	331	300		1552	1452	1436	1324	1200		100	93.5567	92.5258	85.3093	77.3196
	382	367	342	335	299		1528	1468	1368	1340	1196		100	96.0733	89.5288	87.6963	78.2723
	389	373	340	332	289		1556	1492	1360	1328	1156		100	95.8869	87.4036	85.347	74.2931
	386	370	346	329	301		1544	1480	1384	1316	1204		100	95.8549	89.6373	85.2332	77.9793
	387	371	342	319	305		1548	1484	1368	1276	1220		100	95.8656	88.3721	82.4289	78.8114
	385	369	348	311	299		1540	1476	1392	1244	1196		100	95.8442	90.3896	80.7792	77.6623
exp2	400	379	360	340	312		1600	1516	1440	1360	1248		100	94.75	90	85	78
	389	378	361	342	299		1556	1512	1444	1368	1196		100	97.1722	92.8021	87.9177	76.8638
	402	372	359	330	300		1608	1488	1436	1320	1200		100	92.5373	89.3035	82.0896	74.6269
	392	374	355	331	311		1568	1496	1420	1324	1244		100	95.4082	90.5612	84.4388	79.3367
	389	385	362	331	300		1556	1540	1448	1324	1200		100	98.9717	93.0591	85.09	77.1208
	400	379	361	332	289		1600	1516	1444	1328	1156		100	94.75	90.25	83	72.25
avrg							1563	1493.33	1411.67	1321	1201.33		100	95.5559	90.3194	84.5275	76.878
std dev							25.93	24.3211	34.5131	33.2976	27.8872		0	1.63361	1.73531	2.14463	2.09406
							100	95.5428	90.3178	84.517	76.8607
						*4
P069 (Control)	0	5	10	15	20
exp1	374	304	346	314	304		1496	1216	1384	1256	1216		100	81.2834	92.5134	83.9572	81.2834
	369	288	328	310	300		1476	1152	1312	1240	1200		100	78.0488	88.8889	84.0108	81.3008			P069
	360	271	314	311	299		1440	1084	1256	1244	1196		100	75.2778	87.2222	86.3889	83.0556			Means
	387	300	316	309	295		1548	1200	1264	1236	1180		100	77.5194	81.6537	79.845	76.2274				0	5	10	15	20
	361	290	320	305	291		1444	1160	1280	1220	1164		100	80.3324	88.6427	84.4875	80.6094			Control	100	86.4422	88.2266	83.5501	79.5621
	365	310	319	312	290		1460	1240	1276	1248	1160		100	84.9315	87.3973	85.4795	79.4521			GSII	100	93.707	79.6277	80.3381	63.6287
exp2	389	352	347	316	300		1556	1408	1388	1264	1200		100	90.4884	89.2031	81.2339	77.1208			PACS	100	94.1828	89.1354	83.4212	80.3061
	380	362	348	321	310		1520	1448	1392	1284	1240		100	95.2632	91.5789	84.4737	81.5789
	379	361	338	320	309		1516	1444	1352	1280	1236		100	95.2507	89.1821	84.4327	81.5303			stdev
	390	360	340	319	305		1560	1440	1360	1276	1220		100	92.3077	87.1795	81.7949	78.2051				0	5	10	15	20
	389	359	341	322	300		1556	1436	1364	1288	1200		100	92.2879	87.6607	82.7763	77.1208			Control	0	7.64714	2.67658	1.84567	2.28468
	387	365	339	324	299		1548	1460	1356	1296	1196		100	94.3152	87.5969	83.7209	77.261			GSII	0	1.95227	2.16942	12.7672	1.31724
avrg							1510	1307.33	1332	1261	1200.67		100	86.4422	88.2266	83.5501	79.5621			PACS	0	2.22581	2.88686	2.17573	2.03671
stdev							45.5911	143.391	51.225	23.9469	24.9994		0	7.64714	2.67658	1.84567	2.28468
P069 (GSII)	0	5	10	15	20
exp1	400	372	310	289	250		1600	1488	1240	1156	1000		100	93	77.5	72.25	62.5
	402	376	312	289	252		1608	1504	1248	1156	1008		100	93.5323	77.6119	71.8905	62.6866
	397	369	310	279	249		1588	1476	1240	1116	996		100	92.9471	78.0856	70.2771	62.7204
	396	360	311	280	250		1584	1440	1244	1120	1000		100	90.9091	78.5354	70.7071	63.1313
	389	362	309	282	253		1556	1448	1236	1128	1012		100	93.0591	79.4344	72.4936	65.0386
	390	365	300	279	255		1560	1460	1200	1116	1020		100	93.5897	76.9231	71.5385	65.3846
exp2	389	369	312	369	249		1556	1476	1248	1476	996		100	94.8586	80.2057	94.8586	64.0103
	387	362	322	378	250		1548	1448	1288	1512	1000		100	93.5401	83.2041	97.6744	64.5995
	382	379	319	379	252		1528	1516	1276	1516	1008		100	99.2147	83.5079	99.2147	65.9686
	386	361	315	380	243		1544	1444	1260	1520	972		100	93.5233	81.6062	98.4456	62.9534
	390	362	309	281	242		1560	1448	1236	1124	968		100	92.8205	79.2308	72.0513	62.0513
	384	359	306	279	240		1536	1436	1224	1116	960		100	93.4896	79.6875	72.6562	62.5
avrg							1564	1465.33	1245	1254.67	995		100	93.707	79.6277	80.3381	63.6287
stdev							25.413	26.4415	22.8274	186.429	18.6157		0	1.95227	2.16942	12.7672	1.31724
P069 (PACS)	0	5	10	15	20
exp1	397	362	330	321	300		1588	1448	1320	1284	1200		100	91.1839	83.1234	80.8564	75.5668
	392	360	342	320	309		1568	1440	1368	1280	1236		100	91.8367	87.2449	81.6327	78.8265
	390	370	350	319	311		1560	1480	1400	1276	1244		100	94.8718	89.7436	81.7949	79.7436
	389	381	331	323	319		1556	1524	1324	1292	1276		100	97.9434	85.09	83.0334	82.0051
	387	369	346	320	312		1548	1476	1384	1280	1248		100	95.3488	89.4057	82.6873	80.6202
	400	362	351	321	319		1600	1448	1404	1284	1276		100	90.5	87.75	80.25	79.75
exp2	400	382	362	340	331		1600	1528	1448	1360	1324		100	95.5	90.5	85	82.75
	402	389	369	342	332		1608	1556	1476	1368	1328		100	96.7662	91.791	85.0746	82.5871
	412	387	368	341	330		1648	1548	1472	1364	1320		100	93.932	89.3204	82.767	80.0971
	399	380	370	349	329		1596	1520	1480	1396	1316		100	95.2381	92.7318	87.4687	82.4561
	409	382	372	350	328		1636	1528	1488	1400	1312		100	93.3985	90.9535	85.5746	80.1956
	411	385	378	349	325		1644	1540	1512	1396	1300		100	93.674	91.9708	84.9148	79.0754
avrg							1596	1503	1423	1331.67	1281.67		100	94.1828	89.1354	83.4212	80.3061
stdev							34.1547	42.0606	65.4189	52.8038	41.7946		0	2.22581	2.88686	2.17573	2.03671
						*4
8146 (control)	0	5	10	15	20
exp1	301	313	300	271	261		1204	1252	1200	1084	1044		100	103.987	99.6678	90.0332	86.711
	307	317	299	282	259		1228	1268	1196	1128	1036		100	103.257	97.3941	91.8567	84.3648			8146
	306	317	297	280	260		1224	1268	1188	1120	1040		100	103.595	97.0588	91.5033	84.9673			Means
	311	310	295	279	249		1244	1240	1180	1116	996		100	99.6785	94.8553	89.7106	80.0643				0	5	10	15	20
	310	312	296	278	252		1240	1248	1184	1112	1008		100	100.645	95.4839	89.6774	81.2903			Control	100	103.676	98.9725	93.203	86.9677
	309	315	294	276	250		1236	1260	1176	1104	1000		100	101.942	95.1456	89.3204	80.9061			GSII	100	96.5696	83.6968	75.663	67.7074
exp2	320	312	300	282	262		1280	1248	1200	1128	1048		100	97.5	93.75	88.125	81.875			PACS	100	97.0187	94.3459	85.84	79.2077
	221	309	301	286	267		884	1236	1204	1144	1068		100	139.819	136.199	129.412	120.814
	319	308	302	279	270		1276	1232	1208	1116	1080		100	96.5517	94.6708	87.4608	84.6395			stdev
	311	310	295	281	271		1244	1240	1180	1124	1084		100	99.6785	94.8553	90.3537	87.1383				0	5	10	15	20
	315	311	297	286	270		1260	1244	1188	1144	1080		100	98.7302	94.2857	90.7937	85.7143			Control	0	11.6328	11.8426	11.4705	10.9105
	316	312	298	285	269		1264	1248	1192	1140	1076		100	98.7342	94.3038	90.1899	85.1266			GSII	0	0.900378	2.19912	3.86494	1.97053
avrg							1215.33	1248.67	1191.33	1121.67	1046.67		100	103.676	98.9725	93.203	86.9677			PACS	0	1.96454	3.90726	3.58313	2.74061
stdev							106.622	11.6723	10.3514	17.3485	32.1059		0	11.6328	11.8426	11.4705	10.9105
8146 (GSII)	0	5	10	15	20
exp1	320	310	270	242	221		1280	1240	1080	968	884		100	96.875	84.375	75.625	69.0625
	319	308	272	246	220		1276	1232	1088	984	880		100	96.5517	85.2665	77.116	68.9655
	318	305	270	250	224		1272	1220	1080	1000	896		100	95.9119	84.9057	78.6164	70.4403
	315	304	269	257	209		1260	1216	1076	1028	836		100	96.5079	85.3968	81.5873	66.3492
	317	302	268	249	219		1268	1208	1072	996	876		100	95.2681	84.5426	78.5489	69.0852
	312	304	270	253	209		1248	1216	1080	1012	836		100	97.4359	86.5385	81.0897	66.9872
	319	310	275	251	210		1276	1240	1100	1004	840		100	97.1787	86.2069	78.6834	65.8307
exp2	318	302	267	230	200		1272	1208	1068	920	800		100	94.9686	83.9623	72.327	62.8931
	316	305	265	231	211		1264	1220	1060	924	844		100	96.519	83.8608	73.1013	66.7722
	315	304	255	220	215		1260	1216	1020	880	860		100	96.5079	80.9524	69.8413	68.254
	312	300	254	229	216		1248	1200	1016	916	864		100	96.1538	81.4103	73.3974	69.2308
	311	306	250	225	214		1244	1224	1000	900	856		100	98.3923	80.3859	72.3473	68.8103
	314	305	252	224	212		1256	1220	1008	896	848		100	97.1338	80.2548	71.3376	67.5159
avrg							1263.38	1220	1057.54	956	855.385		100	96.5696	83.6968	75.663	67.7074
stdev							11.8711	11.8884	33.923	51.251	25.5524		0	0.900378	2.19912	3.86494	1.97053
8146 (PACS)	0	5	10	15	20
exp1	315	310	299	282	259		1260	1240	1196	1128	1036		100	98.4127	94.9206	89.5238	82.2222
	320	312	287	272	247		1280	1248	1148	1088	988		100	97.5	89.6875	85	77.1875
	319	309	299	274	248		1276	1236	1196	1096	992		100	96.8652	93.7304	85.8934	77.7429
	316	308	295	276	249		1264	1232	1180	1104	996		100	97.4684	93.3544	87.3418	78.7975
	317	307	287	265	250		1268	1228	1148	1060	1000		100	96.8454	90.5363	83.5962	78.8644
	319	306	296	262	253		1276	1224	1184	1048	1012		100	95.9248	92.79	82.1317	79.3103
exp2	350	345	316	283	275		1400	1380	1264	1132	1100		100	98.5714	90.2857	80.8571	78.5714
	350	340	329	282	262		1400	1360	1316	1128	1048		100	97.1429	94	80.5714	74.8571
	315	319	327	290	252		1260	1276	1308	1160	1008		100	101.27	103.81	92.0635	80
	342	322	322	295	260		1368	1288	1288	1180	1040		100	94.152	94.152	86.2573	76.0234
	333	320	328	292	280		1332	1280	1312	1168	1120		100	96.0961	98.4985	87.6877	84.0841
	332	312	320	296	275		1328	1248	1280	1184	1100		100	93.9759	96.3855	89.1566	82.8313
avrg							1309.33	1270	1235	1123	1036.67		100	97.0187	94.3459	85.84	79.2077
stdev							54.3212	51.3526	65.5744	45.1301	46.6112		0	1.96454	3.90726	3.58313	2.74061
						*4
8026 (control)	0	5	10	15	20
exp1	389	356	341	300	299		1556	1424	1364	1200	1196		100	91.5167	87.6607	77.1208	76.8638
	400	360	338	310	295		1600	1440	1352	1240	1180		100	90	84.5	77.5	73.75			8026
	372	352	337	321	299		1488	1408	1348	1284	1196		100	94.6237	90.5914	86.2903	80.3763			Means
	369	361	340	320	290		1476	1444	1360	1280	1160		100	97.832	92.1409	86.7209	78.5908				0	5	10	15	20
	378	358	342	319	291		1512	1432	1368	1276	1164		100	94.709	90.4762	84.3915	76.9841			Control	100	95.1984	90.7929	84.8449	80.2585
	372	362	335	317	292		1488	1448	1340	1268	1168		100	97.3118	90.0538	85.2151	78.4946			GSII	100	89.5278	80.0079	70.2659	59.4669
exp2	400	372	382	352	340		1600	1488	1528	1408	1360		100	93	95.5	88	85			PACS	100	95.3488	89.9	85.3773	80.5957
	410	389	374	354	339		1640	1556	1496	1416	1356		100	94.878	91.2195	86.3415	82.6829
	409	392	375	350	341		1636	1568	1500	1400	1364		100	95.8435	91.687	85.5746	83.3741			stdev
	411	398	377	355	332		1644	1592	1508	1420	1328		100	96.837	91.7275	86.3747	80.7786				0	5	10	15	20
	410	397	376	351	335		1640	1588	1504	1404	1340		100	96.8293	91.7073	85.6098	81.7073			Control	0	2.65773	2.67797	3.72311	3.4237
	400	396	369	356	338		1600	1584	1476	1424	1352		100	99	92.25	89	84.5			GSII	0	2.48517	3.81102	5.9379	7.54071
avrg							1573.33	1497.67	1428.67	1335	1263.67		100	95.1984	90.7929	84.8449	80.2585			PACS	0	2.17543	1.13494	1.26857	2.26674
stdev							66.0872	73.4888	77.7658	83.5943	91.2692		0	2.65773	2.67797	3.72311	3.4237
8026 (GSII)	0	5	10	15	20
	387	352	325	295	270		1548	1408	1300	1180	1080		100	90.9561	83.9793	76.2274	69.7674
	389	354	330	290	250		1556	1416	1320	1160	1000		100	91.0026	84.8329	74.5501	64.2674
	390	350	326	295	252		1560	1400	1304	1180	1008		100	89.7436	83.5897	75.641	64.6154
	382	356	313	297	249		1528	1424	1252	1188	996		100	93.1937	81.9372	77.7487	65.1832
	384	357	321	290	250		1536	1428	1284	1160	1000		100	92.9688	83.5938	75.5208	65.1042
	386	350	322	291	269		1544	1400	1288	1164	1076		100	90.6736	83.4197	75.3886	69.6891
exp2	390	350	300	250	200		1560	1400	1200	1000	800		100	89.7436	76.9231	64.1026	51.2821
	400	351	302	262	210		1600	1404	1208	1048	840		100	87.75	75.5	65.5	52.5
	410	352	310	267	210		1640	1408	1240	1068	840		100	85.8537	75.6098	65.122	51.2195
	402	360	309	265	219		1608	1440	1236	1060	876		100	89.5522	76.8657	65.9204	54.4776
	409	357	311	255	220		1636	1428	1244	1020	880		100	87.2861	76.0391	62.3472	53.7897
	410	351	319	267	212		1640	1404	1276	1068	848		100	85.6098	77.8049	65.122	51.7073
avrg							1579.67	1413.33	1262.67	1108	937		100	89.5278	80.0079	70.2659	59.4669
stdev							42.4849	13.5736	38.455	69.9506	99.411		0	2.48517	3.81102	5.9379	7.54071
8026 (PACS)	0	5	10	15	20
exp1	410	395	362	354	342		1640	1580	1448	1416	1368		100	96.3415	88.2927	86.3415	83.4146
	405	397	367	356	339		1620	1588	1468	1424	1356		100	98.0247	90.6173	87.9012	83.7037
	410	399	365	350	330		1640	1596	1460	1400	1320		100	97.3171	89.0244	85.3659	80.4878
	406	397	372	351	332		1624	1588	1488	1404	1328		100	97.7833	91.6256	86.4532	81.7734
	409	380	369	352	335		1636	1520	1476	1408	1340		100	92.9095	90.22	86.0636	81.9071
	410	389	370	349	336		1640	1556	1480	1396	1344		100	94.878	90.2439	85.122	81.9512
exp2	400	395	367	342	330		1600	1580	1468	1368	1320		100	98.75	91.75	85.5	82.5
	410	387	362	350	321		1640	1548	1448	1400	1284		100	94.3902	88.2927	85.3659	78.2927
	412	382	369	348	320		1648	1528	1476	1392	1280		100	92.7184	89.5631	84.466	77.6699
	410	385	368	349	321		1640	1540	1472	1396	1284		100	93.9024	89.7561	85.122	78.2927
	411	386	370	342	328		1644	1544	1480	1368	1312		100	93.9173	90.0243	83.2117	79.8054
	415	387	369	347	321		1660	1548	1476	1388	1284		100	93.253	88.9157	83.6145	77.3494
avrg							1633.82	1560.73	1469.45	1397.45	1321.45		100	95.3488	89.8605	85.3773	80.5957
stdev							15.2554	25.6669	12.4754	16.6969	30.3894		0	2.17543	1.13494	1.26857	2.26674
