# Supplementary material for: A semi-synthetic glycosaminoglycan analogue inhibits and reverses Plasmodium falciparum cytoadherence
Source: PLoS One. 2017 Oct 18;12(10):e0186276. doi: 10.1371/journal.pone.0186276 (PMC5646806; doi:10.1371/journal.pone.0186276)
Supplement: S4 Data — (XLSX) [file pone.0186276.s009.xlsx]

## Sheet: Sheet1
static reversal (HUVEC) patient isolates MS34 and MS40
							*4
ItG (Control -TNF)(exp1)	1	2	3	4	5	6
1	1	2	1	2	0	3		4	8	4	8	0	12
2	0	2	3	0	1	2		0	8	12	0	4	8
3	2	1	2	3	1	0		8	4	8	12	4	0
ItG (Control -TNF)(exp2)
1	1	0	2	1	1	1		4	0	8	4	4	4
2	1	2	3	5	4	2		4	8	12	20	16	8
3	2	5	4	0	3	2		8	20	16	0	12	8
								4.66667	8	10	7.33333	6.66667	6.66667	7.22222
														1.75963
ItG (Control + TNF)	1	2	3	4	5	6											Means
1	103	105	121	119	115	120		412	420	484	476	460	480					Control	GSII	PACS
2	115	100	115	112	119	115		460	400	460	448	476	460				ItG	838.667	378.333	764.556
3	100	99	98	101	112	116		400	396	392	404	448	464				P069	727.889	487.111	647.222
ItG (Control + TNF)(exp 2)																	8146	400.778	201.556	362.889
1	300	289	295	300	320	321		1200	1156	1180	1200	1280	1284				8026	1170.11	758	1074.56
2	315	310	311	312	315	311		1260	1240	1244	1248	1260	1244
3	310	315	310	309	305	315		1240	1260	1240	1236	1220	1260
								828.667	812	833.333	835.333	857.333	865.333	838.667			Stdev
														19.546				Control	GSII	PACS
																	ItG	19.546	7.23878	15.2515
ITG GSII (exp1)	1	2	3	4	5	6											P069	17.7309	19.1771	19.5569
1	42	40	39	38	42	41		168	160	156	152	168	164				8146	12.6239	16.8426	10.8457
2	60	52	41	42	40	39		240	208	164	168	160	156				8026	19.1853	20.9125	19.6928
3	39	40	35	36	42	45		156	160	140	144	168	180
ITG GSII (exp2)
1	152	150	142	144	142	140		608	600	568	576	568	560
2	135	142	140	154	150	148		540	568	560	616	600	592
3	155	150	155	150	145	158		620	600	620	600	580	632
								388.667	382.667	368	376	374	380.667	378.333
														7.23878
ItG PACS (exp1)	1	2	3	4	5	6
1	92	101	95	98	92	93		368	404	380	392	368	372
2	100	121	100	111	115	98		400	484	400	444	460	392
3	102	105	111	120	105	103		408	420	444	480	420	412
ItG PACS (exp2)
1	285	284	286	284	278	281		1140	1136	1144	1136	1112	1124
2	285	275	285	284	280	279		1140	1100	1140	1136	1120	1116
3	300	278	255	267	279	254		1200	1112	1020	1068	1116	1016
								776	776	754.667	776	766	738.667	764.556
														15.2515
p069(Control -TNF)(exp1)	1	2	3	4	5	6
1	10	11	15	12	12	15		40	44	60	48	48	60
2	9	5	8	11	10	6		36	20	32	44	40	24
3	10	15	10	9	11	8		40	60	40	36	44	32
P069(Control -TNF)(exp2)
1	8	11	14	15	16	10		32	44	56	60	64	40
2	10	15	18	20	14	18		40	60	72	80	56	72
3	12	15	16	17	15	13		48	60	64	68	60	52
								39.3333	48	54	56	52	46.6667	49.3333
														6.03692
P069 (Control + TNF)	1	2	3	4	5	6
1	92	98	92	89	91	93		368	392	368	356	364	372
2	102	92	96	100	99	92		408	368	384	400	396	368
3	97	98	100	99	92	95		388	392	400	396	368	380
P069 (Control + TNF)(exp 2)
1	256	278	300	274	251	260		1024	1112	1200	1096	1004	1040
2	258	260	254	269	264	266		1032	1040	1016	1076	1056	1064
3	258	300	254	287	267	278		1032	1200	1016	1148	1068	1112
								708.667	750.667	730.667	745.333	709.333	722.667	727.889
														17.7309
P069 GSII (exp1)	1	2	3	4	5	6
1	30	40	29	50	49	46		120	160	116	200	196	184
2	60	52	60	55	54	50		240	208	240	220	216	200
3	40	42	48	80	45	41		160	168	192	320	180	164
P069 GSII (exp2)
1	154	146	155	160	182	200		616	584	620	640	728	800
2	210	205	211	205	203	200		840	820	844	820	812	800
3	210	211	214	215	214	218		840	844	856	860	856	872
								469.333	464	478	510	498	503.333	487.111
														19.1771
P069 PACS (exp1)	1	2	3	4	5	6
1	62	78	69	72	80	62		248	312	276	288	320	248
2	80	92	95	96	100	98		320	368	380	384	400	392
3	85	86	87	93	99	95		340	344	348	372	396	380
P069 PACS (exp2)
1	232	230	225	254	245	240		928	920	900	1016	980	960
2	245	230	235	246	255	248		980	920	940	984	1020	992
3	250	241	220	225	235	240		1000	964	880	900	940	960
								636	638	620.667	657.333	676	655.333	647.222
														19.5569
8146(Control -TNF)(exp1)	1	2	3	4	5	6
1	0	1	3	4	5	1		0	4	12	16	20	4
2	5	4	6	7	9	5		20	16	24	28	36	20
3	2	5	7	10	8	1		8	20	28	40	32	4
8146(Control -TNF)(exp2)
1	10	5	1	2	4	0		40	20	4	8	16	0
2	2	5	4	0	5	3		8	20	16	0	20	12
3	1	5	8	6	10	9		4	20	32	24	40	36
								13.3333	16.6667	19.3333	19.3333	27.3333	12.6667	18.1111
														5.34027
8146(Control + TNF)	1	2	3	4	5	6
1	110	105	96	100	120	114		440	420	384	400	480	456
2	110	100	95	97	98	96		440	400	380	388	392	384
3	98	92	98	87	99	100		392	368	392	348	396	400
8146(Control + TNF)(exp 2)
1	100	105	106	104	111	100		400	420	424	416	444	400
2	104	100	98	97	92	95		416	400	392	388	368	380
3	98	97	89	91	100	105		392	388	356	364	400	420
								413.333	399.333	388	384	413.333	406.667	400.778
														12.6239
8146 GSII (exp1)	1	2	3	4	5	6
1	50	55	42	41	40	39		200	220	168	164	160	156
2	60	78	45	42	40	48		240	312	180	168	160	192
3	62	60	61	68	54	52		248	240	244	272	216	208
8146 GSII (exp2)
1	55	51	52	42	48	50		220	204	208	168	192	200
2	52	51	53	52	52	54		208	204	212	208	208	216
3	45	48	42	40	48	42		180	192	168	160	192	168
								216	228.667	196.667	190	188	190	201.556
														16.8426
8146 PACS (exp1)	1	2	3	4	5	6
1	95	98	94	92	89	85		380	392	376	368	356	340
2	97	100	95	96	92	90		388	400	380	384	368	360
3	89	85	82	86	87	82		356	340	328	344	348	328
8146 PACS (exp2)
1	95	91	97	92	94	93		380	364	388	368	376	372
2	98	87	75	77	84	90		392	348	300	308	336	360
3	98	95	91	93	92	90		392	380	364	372	368	360
								381.333	370.667	356	357.333	358.667	353.333	362.889
														10.8457
8026(Control -TNF)(exp1)	1	2	3	4	5	6
1	11	15	10	12	10	14		44	60	40	48	40	56
2	5	14	6	8	10	11		20	56	24	32	40	44
3	5	4	3	6	8	7		20	16	12	24	32	28
8026(Control -TNF)(exp2)
1	2	5	14	10	16	5		8	20	56	40	64	20
2	2	5	0	1	4	9		8	20	0	4	16	36
3	6	7	3	4	10	9		24	28	12	16	40	36
								20.6667	33.3333	24	27.3333	38.6667	36.6667	30.1111
														7.22239
8026(Control + TNF)	1	2	3	4	5	6
1	325	342	340	333	320	325		1300	1368	1360	1332	1280	1300
2	320	315	316	320	315	314		1280	1260	1264	1280	1260	1256
3	355	312	315	310	309	318		1420	1248	1260	1240	1236	1272
8026(Control + TNF)(exp 2)
1	258	242	257	260	245	241		1032	968	1028	1040	980	964
2	260	272	280	255	267	261		1040	1088	1120	1020	1068	1044
3	280	272	264	280	262	271		1120	1088	1056	1120	1048	1084
								1198.67	1170	1181.33	1172	1145.33	1153.33	1170.11
														19.1853
8026 MS34 (exp1)	1	2	3	4	5	6
1	259	266	268	270	252	240		1036	1064	1072	1080	1008	960
2	242	240	241	231	243	241		968	960	964	924	972	964
3	238	236	234	235	260	245		952	944	936	940	1040	980
8026 MS34 (exp2)
1	150	155	140	120	104	124		600	620	560	480	416	496
2	146	144	134	125	124	120		584	576	536	500	496	480
3	130	133	135	126	143	128		520	532	540	504	572	512
								776.667	782.667	768	738	750.667	732	758
														20.9125
8026 MS40 (exp1)	1	2	3	4	5	6
1	300	312	315	320	314	308		1200	1248	1260	1280	1256	1232
2	306	315	311	312	309	308		1224	1260	1244	1248	1236	1232
3	300	315	300	310	299	278		1200	1260	1200	1240	1196	1112
8026 MS40 (exp2)
1	241	222	230	231	225	224		964	888	920	924	900	896
2	231	235	224	226	212	221		924	940	896	904	848	884
3	236	245	241	236	235	224		944	980	964	944	940	896
								1076	1096	1080.67	1090	1062.67	1042	1074.56
														19.6928
