# Supplementary material for: A semi-synthetic glycosaminoglycan analogue inhibits and reverses Plasmodium falciparum cytoadherence
Source: PLoS One. 2017 Oct 18;12(10):e0186276. doi: 10.1371/journal.pone.0186276 (PMC5646806; doi:10.1371/journal.pone.0186276)
Supplement: S5 Data — (XLSX) [file pone.0186276.s010.xlsx]

## Sheet: Sheet1
flow reversal (HUVEC) patient isolate with GSII and PACS
						*4 to convert to prbc/mm2							Convert to % 0 min
ItG (Control)	0	5	10	15	20
exp 1	120	115	100	88	75		480	460	400	352	300		100	95.8333	83.3333	73.3333	62.5		ItG
	125	111	100	75	60		500	444	400	300	240		100	88.8	80	60	48		Means
	140	120	100	70	55		560	480	400	280	220		100	85.7143	71.4286	50	39.2857			0	5	10	15	20
	135	100	111	80	64		540	400	444	320	256		100	74.0741	82.2222	59.2593	47.4074		Control	100	93.1727	91.4549	65.1042	54.0174
	125	110	105	85	65		500	440	420	340	260		100	88	84	68	52		GSII	100	93.7415	58.4686	49.732	21.0719
	120	100	110	72	60		480	400	440	288	240		100	83.3333	91.6667	60	50		PACS	100	99.0382	89.6939	82.157	71.1847
exp2	120	100	109	75	50		480	400	436	300	200		100	83.3333	90.8333	62.5	41.6667
	119	108	108	74	65		476	432	432	296	260		100	90.7563	90.7563	62.1849	54.6218		stdev
	100	112	108	72	64		400	448	432	288	256		100	112	108	72	64			0	5	10	15	20
	119	115	115	70	69		476	460	460	280	276		100	96.6387	96.6387	58.8235	57.9832		Control	0	12.487	12.4904	8.63248	9.13826
	102	120	116	82	68		408	480	464	328	272		100	117.647	113.725	80.3922	66.6667		GSII	0	5.48142	6.55253	8.81686	3.68902
	103	105	108	77	66		412	420	432	308	264		100	101.942	104.854	74.7573	64.0777		PACS	0	7.21531	6.58607	6.71131	7.22071
							476	438.667	430	306.667	253.667		100	93.1727	91.4549	65.1042	54.0174
							49.4037	29.1121	21.7423	23.5925	26.2274		0	12.487	12.4904	8.63248	9.13826
ItG (GSII)	0	5	10	15	20
exp1	100	95	60	40	20		400	380	240	160	80		100	95	60	40	20
	102	94	65	49	29		408	376	260	196	116		100	92.1569	63.7255	48.0392	28.4314
	110	96	55	50	20		440	384	220	200	80		100	87.2727	50	45.4545	18.1818
	105	96	64	49	26		420	384	256	196	104		100	91.4286	60.9524	46.6667	24.7619
	98	98	52	69	21		392	392	208	276	84		100	100	53.0612	70.4082	21.4286
	84	80	45	52	20		336	320	180	208	80		100	95.2381	53.5714	61.9048	23.8095
exp2	85	75	50	40	20		340	300	200	160	80		100	88.2353	58.8235	47.0588	23.5294
	75	70	55	42	12		300	280	220	168	48		100	93.3333	73.3333	56	16
	100	86	56	44	20		400	344	224	176	80		100	86	56	44	20
	99	91	58	49	19		396	364	232	196	76		100	91.9192	58.5859	49.4949	19.1919
	92	95	58	42	20		368	380	232	168	80		100	103.261	63.0435	45.6522	21.7391
	95	96	48	40	15		380	384	192	160	60		100	101.053	50.5263	42.1053	15.7895
							381.667	357.333	222	188.667	80.6667		100	93.7415	58.4686	49.732	21.0719
							39.5781	37.6523	24.2712	32.7118	17.3799		0	5.48142	6.55253	8.81686	3.68902
ItG (PACS)	0	5	10	15	20
exp1	98	93	89	81	70		392	372	356	324	280		100	94.898	90.8163	82.6531	71.4286
	92	90	82	85	79		368	360	328	340	316		100	97.8261	89.1304	92.3913	85.8696
	99	93	84	82	69		396	372	336	328	276		100	93.9394	84.8485	82.8283	69.697
	96	90	86	79	70		384	360	344	316	280		100	93.75	89.5833	82.2917	72.9167
	97	91	84	79	75		388	364	336	316	300		100	93.8144	86.5979	81.4433	77.3196
	95	92	84	71	59		380	368	336	284	236		100	96.8421	88.4211	74.7368	62.1053
exp2	80	95	86	74	62		320	380	344	296	248		100	118.75	107.5	92.5	77.5
	99	94	81	75	69		396	376	324	300	276		100	94.9495	81.8182	75.7576	69.697
	92	92	85	73	60		368	368	340	292	240		100	100	92.3913	79.3478	65.2174
	92	94	85	83	61		368	376	340	332	244		100	102.174	92.3913	90.2174	66.3043
	99	95	82	71	60		396	380	328	284	240		100	95.9596	82.8283	71.7172	60.6061
	90	95	81	72	68		360	380	324	288	272		100	105.556	90	80	75.5556
							376.333	371.333	336.333	308.333	267.333		100	99.0382	89.6939	82.157	71.1847
							21.8729	7.40188	9.41308	19.997	25.8011		0	7.21531	6.58607	6.71131	7.22071
P069 (Control)	0	5	10	15	20
exp1	74	74	66	54	44		296	296	264	216	176		100	100	89.1892	72.973	59.4595		P069
	69	78	68	51	35		276	312	272	204	140		100	113.043	98.5507	73.913	44.8718		Means
	60	71	64	51	39		240	284	256	204	156		100	118.333	106.667	85	54.9296			0	5	10	15	20
	87	80	61	59	35		348	320	244	236	140		100	91.954	70.1149	67.8161	43.75		Control	100	94.6018	83.2607	70.5857	59.0658
	61	70	62	46	41		244	280	248	184	164		100	114.754	101.639	75.4098	58.5714		GSII	100	71.8395	47.8512	39.9936	22.8807
	65	61	69	42	49		260	244	276	168	196		100	93.8462	106.154	64.6154	80.3279		PACS	100	101.44	93.041	84.9255	77.0541
exp2	89	72	64	66	50		356	288	256	264	200		100	80.8989	71.9101	74.1573	69.4444
	80	82	64	62	41		320	328	256	248	164		100	102.5	80	77.5	50		stdev
	79	71	63	62	43		316	284	252	248	172		100	89.8734	79.7468	78.481	60.5634			0	5	10	15	20
	90	70	60	51	45		360	280	240	204	180		100	77.7778	66.6667	56.6667	64.2857		Control	0	15.3409	16.5895	8.67671	10.2559
	89	69	54	52	40		356	276	216	208	160		100	77.5281	60.6742	58.427	57.971		GSII	0	9.41385	6.41003	6.33064	6.52349
	87	65	59	54	42		348	260	236	216	168		100	74.7126	67.8161	62.069	64.6154		PACS	0	10.2603	6.10746	8.43695	9.43875
							310	287.667	251.333	216.667	168		100	94.6018	83.2607	70.5857	59.0658
							45.5911	23.9064	16.3448	27.9133	18.684		0	15.3409	16.5895	8.67671	10.2559
P069 (GSII)	0	5	10	15	20
exp1	70	52	40	29	20		280	208	160	116	80		100	74.2857	57.1429	41.4286	28.5714
	72	56	42	29	22		288	224	168	116	88		100	77.7778	58.3333	40.2778	30.5556
	77	46	40	27	19		308	184	160	108	76		100	59.7403	51.9481	35.0649	24.6753
	76	66	31	28	10		304	264	124	112	40		100	86.8421	40.7895	36.8421	13.1579
	79	52	39	22	13		316	208	156	88	52		100	65.8228	49.3671	27.8481	16.4557
	70	55	30	27	15		280	220	120	108	60		100	78.5714	42.8571	38.5714	21.4286
exp2	78	56	32	26	20		312	224	128	104	80		100	71.7949	41.0256	33.3333	25.641
	78	42	32	37	10		312	168	128	148	40		100	53.8462	41.0256	47.4359	12.8205
	72	47	39	28	20		288	188	156	112	80		100	65.2778	54.1667	38.8889	27.7778
	76	53	35	38	16		304	212	140	152	64		100	69.7368	46.0526	50	21.0526
	70	56	30	31	14		280	224	120	124	56		100	80	42.8571	44.2857	20
	74	58	36	34	24		296	232	144	136	96		100	78.3784	48.6486	45.9459	32.4324
							297.333	213	142	118.667	67.6667		100	71.8395	47.8512	39.9936	22.8807
							13.6803	25.0744	17.6017	18.5538	18.4062		0	9.41385	6.41003	6.33064	6.52349
P069 (PACS)	0	5	10	15	20
exp1	97	92	80	72	60		388	368	320	288	240		100	94.8454	82.4742	74.2268	61.8557
	92	90	82	70	59		368	360	328	280	236		100	97.8261	89.1304	76.087	64.1304
	90	97	85	79	61		360	388	340	316	244		100	107.778	94.4444	87.7778	67.7778
	89	91	81	72	75		356	364	324	288	300		100	102.247	91.0112	80.8989	84.2697
	87	96	86	82	72		348	384	344	328	288		100	110.345	98.8506	94.2529	82.7586
	80	92	81	82	73		320	368	324	328	292		100	115	101.25	102.5	91.25
exp2	80	98	82	74	68		320	392	328	296	272		100	122.5	102.5	92.5	85
	92	89	89	72	63		368	356	356	288	252		100	96.7391	96.7391	78.2609	68.4783
	92	87	86	73	70		368	348	344	292	280		100	94.5652	93.4783	79.3478	76.087
	89	80	79	79	69		356	320	316	316	276		100	89.8876	88.764	88.764	77.5281
	89	82	82	75	72		356	328	328	300	288		100	92.1348	92.1348	84.2697	80.8989
	91	85	78	73	77		364	340	312	292	308		100	93.4066	85.7143	80.2198	84.6154
							356	359.667	330.333	301	273		100	101.44	93.041	84.9255	77.0541
							19.5215	22.7849	13.0407	16.6351	24.428		0	10.2603	6.10746	8.43695	9.43875
8146 (control)	0	5	10	15	20
exp1	60	66	50	51	50		240	264	200	204	200		100	110	83.3333	85	83.3333		8146
	50	69	59	52	55		200	276	236	208	220		100	138	118	104	110		Means
	65	65	57	48	40		260	260	228	192	160		100	100	87.6923	73.8462	61.5385			0	5	10	15	20
	61	55	55	49	42		244	220	220	196	168		100	90.1639	90.1639	80.3279	68.8525		Control	100	99.9155	90.6475	78.7835	71.7668
	60	65	56	47	42		240	260	224	188	168		100	108.333	93.3333	78.3333	70		GSII	100	81.1887	65.6281	60.1316	33.5616
	69	57	54	46	40		276	228	216	184	160		100	82.6087	78.2609	66.6667	57.971		PACS	100	93.5142	86.4368	69.6237	60.913
exp2	62	52	50	42	42		248	208	200	168	168		100	83.871	80.6452	67.7419	67.7419
	61	59	51	48	42		244	236	204	192	168		100	96.7213	83.6066	78.6885	68.8525		stdev
	69	58	52	47	40		276	232	208	188	160		100	84.058	75.3623	68.1159	57.971			0	5	10	15	20
	61	51	55	48	41		244	204	220	192	164		100	83.6066	90.1639	78.6885	67.2131		Control	0	16.6246	12.3968	10.0456	13.9781
	55	61	57	46	40		220	244	228	184	160		100	110.909	103.636	83.6364	72.7273		GSII	0	5.05677	7.1054	7.26087	4.66293
	56	62	58	45	42		224	248	232	180	168		100	110.714	103.571	80.3571	75		PACS	0	5.862	4.5199	4.95513	4.8207
							243	240	218	189.667	172		100	99.9155	90.6475	78.7835	71.7668
							21.8507	22.7556	12.4754	10.5773	18.606		0	16.6246	12.3968	10.0456	13.9781
8146 (GSII)	0	5	10	15	20
exp1	62	50	40	42	21		248	200	160	168	84		100	80.6452	64.5161	67.7419	33.871
	69	58	42	36	20		276	232	168	144	80		100	84.058	60.8696	52.1739	28.9855
	68	55	46	35	24		272	220	184	140	96		100	80.8824	67.6471	51.4706	35.2941
	65	54	46	45	19		260	216	184	180	76		100	83.0769	70.7692	69.2308	29.2308
	67	52	48	40	19		268	208	192	160	76		100	77.6119	71.6418	59.7015	28.3582
	62	54	47	45	20		248	216	188	180	80		100	87.0968	75.8065	72.5806	32.2581
	69	48	45	42	21		276	192	180	168	84		100	69.5652	65.2174	60.8696	30.4348
exp2	68	52	37	43	20		272	208	148	172	80		100	76.4706	54.4118	63.2353	29.4118
	66	53	36	41	21		264	212	144	164	84		100	80.303	54.5455	62.1212	31.8182
	61	54	35	30	25		244	216	140	120	100		100	88.5246	57.377	49.1803	40.9836
	62	50	44	39	26		248	200	176	156	104		100	80.6452	70.9677	62.9032	41.9355
	61	53	45	35	24		244	212	180	140	96		100	86.8852	73.7705	57.377	39.3443
	64	51	42	34	22		256	204	168	136	88		100	79.6875	65.625	53.125	34.375
							260	211	170.333	157.667	86.6667		100	81.1887	65.6281	60.1316	33.5616
							12.877	10.5313	18.0873	18.327	9.69848		0	5.05677	7.1054	7.26087	4.66293
8146 (PACS)	0	5	10	15	20
exp1	65	60	59	42	40		260	240	236	168	160		100	92.3077	90.7692	64.6154	61.5385
	62	62	58	47	37		248	248	232	188	148		100	100	93.5484	75.8065	59.6774
	69	61	59	44	48		276	244	236	176	192		100	88.4058	85.5072	63.7681	69.5652
	66	63	55	46	44		264	252	220	184	176		100	95.4545	83.3333	69.697	66.6667
	67	53	57	45	42		268	212	228	180	168		100	79.1045	85.0746	67.1642	62.6866
	69	66	56	46	45		276	264	224	184	180		100	95.6522	81.1594	66.6667	65.2174
exp2	65	64	59	43	35		260	256	236	172	140		100	98.4615	90.7692	66.1538	53.8462
	60	54	53	42	37		240	216	212	168	148		100	90	88.3333	70	61.6667
	65	61	52	42	35		260	244	208	168	140		100	93.8462	80	64.6154	53.8462
	64	62	53	49	36		256	248	212	196	144		100	96.875	82.8125	76.5625	56.25
	63	58	58	46	38		252	232	232	184	152		100	92.0635	92.0635	73.0159	60.3175
	62	62	52	48	37		248	248	208	192	148		100	100	83.871	77.4194	59.6774
							259	242	223.667	180	158		100	93.5142	86.4368	69.6237	60.913
							11.07	15.303	11.2439	9.64836	17.1835		0	5.862	4.5199	4.95513	4.8207
8026 (control)	0	5	10	15	20
exp1	89	86	71	65	49		356	344	284	260	196		100	96.6292	79.7753	73.0337	55.0562		8026
	90	86	73	66	45		360	344	292	264	180		100	95.5556	81.1111	73.3333	50		Means
	72	85	77	55	49		288	340	308	220	196		100	118.056	106.944	76.3889	68.0556			0	5	10	15	20
	79	86	70	52	50		316	344	280	208	200		100	108.861	88.6076	65.8228	63.2911		Control	100	100.321	80.67	71.57	66.5871
	78	75	70	59	49		312	300	280	236	196		100	96.1538	89.7436	75.641	62.8205		GSII	100	87.6845	60.0552	43.4109	25.436
	72	76	73	57	49		288	304	292	228	196		100	105.556	101.389	79.1667	68.0556		PACS	100	91.8818	85.7107	79.5974	62.1958
exp2	80	72	69	50	50		320	288	276	200	200		100	90	86.25	62.5	62.5
	91	73	37	54	59		364	292	148	216	236		100	80.2198	40.6593	59.3407	64.8352		stdev
	79	79	35	50	54		316	316	140	200	216		100	100	44.3038	63.2911	68.3544			0	5	10	15	20
	71	73	37	55	53		284	292	148	220	212		100	102.817	52.1127	77.4648	74.6479		Control	0	9.90522	22.8477	7.02992	9.21298
	70	77	73	51	55		280	308	292	204	220		100	110	104.286	72.8571	78.5714		GSII	0	5.94004	4.16083	6.60339	6.67912
	70	70	65	56	58		280	280	260	224	232		100	100	92.8571	80	82.8571		PACS	0	6.23673	7.39879	6.54744	4.11286
							313.667	312.667	250	223.333	206.667		100	100.321	80.67	71.57	66.5871
							31.6094	24.2912	64.1702	21.2232	16.6533		0	9.90522	22.8477	7.02992	9.21298
8026 (GSII)	0	5	10	15	20
	87	75	55	35	27		348	300	220	140	108		100	86.2069	63.2184	40.2299	31.0345
	89	74	53	30	25		356	296	212	120	100		100	83.1461	59.5506	33.7079	28.0899
	90	75	56	45	25		360	300	224	180	100		100	83.3333	62.2222	50	27.7778
	82	75	53	47	24		328	300	212	188	96		100	91.4634	64.6341	57.3171	29.2683
	84	77	51	40	15		336	308	204	160	60		100	91.6667	60.7143	47.619	17.8571
	86	70	52	39	36		344	280	208	156	144		100	81.3953	60.4651	45.3488	41.8605
exp2	90	86	50	35	20		360	344	200	140	80		100	95.5556	55.5556	38.8889	22.2222
	90	85	52	36	21		360	340	208	144	84		100	94.4444	57.7778	40	23.3333
	91	85	51	37	21		364	340	204	148	84		100	93.4066	56.044	40.6593	23.0769
	92	76	59	42	20		368	304	236	168	80		100	82.6087	64.1304	45.6522	21.7391
	99	77	51	35	19		396	308	204	140	76		100	77.7778	51.5152	35.3535	19.1919
	91	83	59	42	18		364	332	236	168	72		100	91.2088	64.8352	46.1538	19.7802
							357	312.667	214	154.333	90.3333		100	87.6845	60.0552	43.4109	25.436
							17.3205	20.8777	12.3583	19.4063	21.6725		0	5.94004	4.16083	6.60339	6.67912
8026 (PACS)	0	5	10	15	20
exp1	81	85	76	64	52		324	340	304	256	208		100	104.938	93.8272	79.0123	64.1975
	85	77	77	56	54		340	308	308	224	216		100	90.5882	90.5882	65.8824	63.5294
	80	79	76	74	53		320	316	304	296	212		100	98.75	95	92.5	66.25
	86	78	65	71	52		344	312	260	284	208		100	90.6977	75.5814	82.5581	60.4651
	89	73	65	65	55		356	292	260	260	220		100	82.0225	73.0337	73.0337	61.7978
	81	75	67	69	56		324	300	268	276	224		100	92.5926	82.716	85.1852	69.1358
exp2	80	75	69	64	43		320	300	276	256	172		100	93.75	86.25	80	53.75
	81	78	63	65	52		324	312	252	260	208		100	96.2963	77.7778	80.2469	64.1975
	82	73	69	68	53		328	292	276	272	212		100	89.0244	84.1463	82.9268	64.6341
	80	72	68	64	49		320	288	272	256	196		100	90	85	80	61.25
	84	70	77	63	48		336	280	308	252	192		100	83.3333	91.6667	75	57.1429
	85	77	79	67	51		340	308	316	268	204		100	90.5882	92.9412	78.8235	60
							330.545	303.636	280.727	262.909	206.182		100	91.8818	85.7107	79.5974	62.1958
							11.6723	15.8171	22.721	18.1175	14.013		0	6.23673	7.39879	6.54744	4.11286
