# Supplementary material for: A semi-synthetic glycosaminoglycan analogue inhibits and reverses Plasmodium falciparum cytoadherence
Source: PLoS One. 2017 Oct 18;12(10):e0186276. doi: 10.1371/journal.pone.0186276 (PMC5646806; doi:10.1371/journal.pone.0186276)
Supplement: S6 Data — (XLSX) [file pone.0186276.s011.xlsx]

## Sheet: aPTT
APTT GSII vs PMH
PMH - Porcine Mucosal Heparin
Conc
	Rpt1	Rpt2	Rpt3		Mean	S.D.	SEM		Raw rpt1 sec	Raw rpt2 sec	Raw rpt3 sec
10mg/ml	100	100	100		100	0	0		120	120	120
1mg/ml	100	100	100		100	0	0		120	120	120
100ug/ml	100	100	100		100	0	0		120	120	120
10ug/ml	100	100	100		100	0	0		120	120	120
1ug/ml	6.3584	5.5492	5.7804		5.896	0.416802	0.240641		39	38.3	38.5
100ng/ml	1.3873	2.081	2.5434		2.0039	0.581894	0.335956		34.7	35.3	35.7
10ng/ml	0	1.3873	1.6185		1.00193	0.875366	0.505393		33.5	34.7	34.9
Water									33.7	32.8	34.5
Glycogen Sulfate (II)
Conc
100mg/ml	100	100	100		100	0	0		120	120	120
10mg/ml	100	100	100		100	0	0		120	120	120
1mg/ml	14.9522	12.9187	11.9617		13.2775	1.5272	0.88173		48.9	47.2	46.4
100ug/ml	2.2727	2.0335	1.6746		1.9936	0.30104	0.173805		38.3	38.1	37.8
10ug/ml	1.1962	0	0.4785		0.558233	0.602073	0.347607		37.4	36.4	36.8
Water									37.1	37.4	36.2

## Sheet: PT
APTT GSII vs PMH
PMH - Porcine Mucosal Heparin
Conc
	Rpt1	Rpt2	Rpt3		Mean	S.D.	SEM			Raw rpt1 sec	Raw rpt2 sec	Raw rpt3 sec
1mg/ml	100	100	100		100	0	0			120	120	120
100ug/ml	100	100	100		100	0	0			120	120	120
10ug/ml	3.8282	3.36134	2.89449		3.36134	0.466853	0.269538			17	16.5	16
1ug/ml	0.653595	-2.07325e-16	0.840336		0.497977	0.441253	0.254757			13.6	12.9	13.8
100ng/ml	0.840336	0.653595	0.840336		0.778089	0.107815	0.0622471			13.8	13.6	13.8
Water										14	14.2	14.3
Glycogen Sulfate (II)
Conc
100mg/ml	100	100	100		100	0	0			120	120	120
10mg/ml	100	100	100		100	0	0			120	120	120
1mg/ml	1.26924	0.906588	-3.02206e-05		0.725264	0.653772	0.377455			11.1	10.7	9.7
100ug/ml	1.54122	1.45056	1.08791		1.3599	0.239869	0.138488			11.4	11.3	10.9
Water										13.3	13.3	13.4
