# Supplementary material for: A semi-synthetic glycosaminoglycan analogue inhibits and reverses Plasmodium falciparum cytoadherence
Source: PLoS One. 2017 Oct 18;12(10):e0186276. doi: 10.1371/journal.pone.0186276 (PMC5646806; doi:10.1371/journal.pone.0186276)
Supplement: S7 Data — (XLSX) [file pone.0186276.s012.xlsx]

## Sheet: Sheet1
mg/ml	Abs 1	Abs 2	Abs 3		Average Abs	stdev		% proliferation average	%Sdev
10	0.894401	0.996521	0.976948		0.955957	0.0541996		112.333	6.36894
1	0.818662	0.801642	0.888444		0.836249	0.045996		98.2667	5.40494
0.1	0.873977	0.850149	0.845043		0.85639	0.0154436		100.633	1.81475
0.01	0.848447	0.884189	0.826321		0.852986	0.0291998		100.233	3.43123
0.001	0.853553	0.797387	0.768453		0.806464	0.0432701		94.7667	5.08462
0.0001	0.862063	0.850149	0.822066		0.844759	0.020536		99.2667	2.41316
PBS	0.7933	0.9161	0.8436		0.851	0.0617335		100	7.25424
Unpaired t-test against PBS
10mgml				1mgml				0.1mgml
Unpaired t test				Unpaired t test				Unpaired t test
P value	0.0914			P value	0.7564			P value	0.8909
P value summary	ns			P value summary	ns			P value summary	ns
Significantly different (P < 0.05)?	No			Significantly different (P < 0.05)?	No			Significantly different (P < 0.05)?	No
One- or two-tailed P value?	Two-tailed			One- or two-tailed P value?	Two-tailed			One- or two-tailed P value?	Two-tailed
t, df	t=2.213 df=4			t, df	t=0.3323 df=4			t, df	t=0.146 df=4
How big is the difference?				How big is the difference?				How big is the difference?
Mean ± SEM of column A	0.9559 ± 0.03128, n=3			Mean ± SEM of column B	0.8362 ± 0.02655, n=3			Mean ± SEM of column C	0.8564 ± 0.008939, n=3
Mean ± SEM of column G	0.851 ± 0.03564, n=3			Mean ± SEM of column G	0.851 ± 0.03564, n=3			Mean ± SEM of column G	0.851 ± 0.03564, n=3
Difference between means	-0.1049 ± 0.04742			Difference between means	0.01477 ± 0.04444			Difference between means	-0.005367 ± 0.03675
95% confidence interval	-0.2366 to 0.02673			95% confidence interval	-0.1086 to 0.1382			95% confidence interval	-0.1074 to 0.09666
R squared (eta squared)	0.5504			R squared (eta squared)	0.02686			R squared (eta squared)	0.005304
F test to compare variances				F test to compare variances				F test to compare variances
F, DFn, Dfd	1.298, 2, 2			F, DFn, Dfd	1.803, 2, 2			F, DFn, Dfd	15.9, 2, 2
P value	0.8703			P value	0.7136			P value	0.1184
P value summary	ns			P value summary	ns			P value summary	ns
Significantly different (P < 0.05)?	No			Significantly different (P < 0.05)?	No			Significantly different (P < 0.05)?	No
0.01mgml				0.001mgml				0.0001mgml
Unpaired t test				Unpaired t test				Unpaired t test
P value	0.9626			P value	0.3644			P value	0.8762
P value summary	ns			P value summary	ns			P value summary	ns
Significantly different (P < 0.05)?	No			Significantly different (P < 0.05)?	No			Significantly different (P < 0.05)?	No
One- or two-tailed P value?	Two-tailed			One- or two-tailed P value?	Two-tailed			One- or two-tailed P value?	Two-tailed
t, df	t=0.04987 df=4			t, df	t=1.022 df=4			t, df	t=0.166 df=4
How big is the difference?				How big is the difference?				How big is the difference?
Mean ± SEM of column D	0.853 ± 0.01687, n=3			Mean ± SEM of column E	0.8065 ± 0.02498, n=3			Mean ± SEM of column F	0.8448 ± 0.01185, n=3
Mean ± SEM of column G	0.851 ± 0.03564, n=3			Mean ± SEM of column G	0.851 ± 0.03564, n=3			Mean ± SEM of column G	0.851 ± 0.03564, n=3
Difference between means	-0.001967 ± 0.03943			Difference between means	0.0445 ± 0.04353			Difference between means	0.006233 ± 0.03756
95% confidence interval	-0.1114 to 0.1075			95% confidence interval	-0.07635 to 0.1653			95% confidence interval	-0.09805 to 0.1105
R squared (eta squared)	0.0006215			R squared (eta squared)	0.2072			R squared (eta squared)	0.006838
F test to compare variances				F test to compare variances				F test to compare variances
F, DFn, Dfd	4.464, 2, 2			F, DFn, Dfd	2.035, 2, 2			F, DFn, Dfd	9.045, 2, 2
P value	0.366			P value	0.6589			P value	0.1991
P value summary	ns			P value summary	ns			P value summary	ns
Significantly different (P < 0.05)?	No			Significantly different (P < 0.05)?	No			Significantly different (P < 0.05)?	No
